# Supplementary material for: Alpha Power and Functional Connectivity in Cognitive Decline: A Systematic Review and Meta-Analysis
Source: PubMed Central journal article supplement — J Alzheimers Dis. 2020 Nov 24;78(3):1047–88. doi: 10.3233/JAD-200962 (PMC7739973; doi:10.3233/jad-200962), 2020-11-24
Supplement: jad-78-jad200962-s001.pdf [file jad-78-jad200962-s001.pdf]

# Supplementary Material

## Alpha Power and Functional Connectivity in Cognitive Decline: A Systematic Review and Meta-Analysis

### Supplementary Material 1: Studies Excluded due to Overlapping Samples

To avoid biasing our results, we only included studies that were, to the best of our knowledge, based on independent samples. When several studies were based on completely or partially overlapping samples, we only included the most recent publication, the publication with the largest sample size, and/or the most prototypical study. Moreover, we prioritized publications with available means and standard deviations to maximize the amount of studies we could include in meta-analyses. When there was reason to believe several publications came from the same sample, we contacted authors of original studies to confirm whether or not the samples were independent.

Due to overlapping samples, we did not include several studies by Babiloni et al. [1–21]. Findings of these studies are in line with those we included, suggesting less alpha current source density in the lower alpha band in people with MCI than in cognitively healthy older adults, and in people with AD than in people with MCI [1–7, 9–13, 15–20]. For the same reason, we also excluded two studies by van der Hiele et al. [22, 23], and one study by Prieto del Val et al. [24], Gonzalez-Escamilla et al. [25], and Vialatte et al. [26].

## Supplementary Material 2: Modified Newcastle-Ottawa Quality Assessment Scale for Case Control Studies and Quality Assessment for Each Study

The modification of the scale was based on Reilly et al. [27]. Instead of calculating a summary measure of quality, the scoring for each study is shown in Supplementary Table 1. Stars (\*) mark items indicating a high level of quality.

### Selection

- 1) Is the case definition of MCI or dementia adequate?
  - a) yes, according to generally accepted diagnostic criteria (e.g., Albert et al. [28], Litvan et al. [29], Petersen et al. [30, 31], Winblad et al. [32] for MCI; McKhann et al. [33, 34] for AD; McKeith et al. [35] for DLB) or equivalent\*
  - b) yes, record linkage or according to customized criteria
  - c) no description
- Is the case definition of MCI ascribed to a particular type of dementia adequate?
  - a) yes, according to proposed diagnostic criteria (e.g., Albert et al. [28] for AD-MCI, Litvan et al. [29] for PD-MCI)\*
  - b) yes, confirmed by follow-up or postmortem examination\*
  - c) no description
- 2) Representativeness of cases
  - a) consecutive or obviously representative series of cases\*
  - b) potential for selection bias or not stated
- 3) Selections of controls
  - a) community controls\*
  - b) hospital controls
  - c) no description
- 4) Definition of controls
  - a) no objective (1/2\*) and subjective (1/2\*) cognitive deficits
  - b) no description of cognitive status

### Comparability

- 5) Comparability of cases and controls on the basis of the design or analysis
  - a) study controls for age\*
  - b) study controls for education\*

### Exposure

- 6) Ascertainment of alpha
  - a) neurophysiological analysis blinded to case/control status\*
  - b) neurophysiological analysis not blinded to case/control status
  - c) no description
- 7) Same method of ascertainment for cases and controls
  - a) yes\*
  - b) no
- 8) Missing or excluded EEG data rate
  - a) same rate for both groups\*
  - b) rate not statistically compared but described
  - c) rate different or no description

**Supplementary Table 1.** Assessment of each study included in the review according to the modified Newcastle-Ottawa scale. Stars (\*) mark items indicating a high level of quality.

| Study                   | Selection                  |                                    |                |                                          |                       |                |                             |                                   |                       |          |                |                                       | Comparability                         |                | Exposure                    |                                   |              |           |                |                                                    |    |                                   |                                               |                                  |
|-------------------------|----------------------------|------------------------------------|----------------|------------------------------------------|-----------------------|----------------|-----------------------------|-----------------------------------|-----------------------|----------|----------------|---------------------------------------|---------------------------------------|----------------|-----------------------------|-----------------------------------|--------------|-----------|----------------|----------------------------------------------------|----|-----------------------------------|-----------------------------------------------|----------------------------------|
|                         | Definition of MCI/dementia |                                    |                | Definition of MCI due to AD, DLB, or FTD |                       |                | Representativeness of cases |                                   | Selection of controls |          |                | Definition of controls                |                                       |                | Comparability               |                                   | EEG analysis |           |                | Same method of alpha ascertainment for all groups? |    | Missing or excluded EEG data rate |                                               |                                  |
|                         | Diagnostic criteria*       | Record linkage/customized criteria | No description | Diagnostic criteria*                     | Follow-up/postmortem* | No description | Consecutive sample*         | Non-consecutive or no description | Community*            | Hospital | No description | No objective cognitive deficits 1/2 * | No subjective cognitive deficits 1/2* | No description | Control or matched for age* | Control or matched for education* | Blind*       | Not blind | No description | Yes*                                               | No | Same for all groups*              | Rate not statistically compared but described | Rate different or no description |
| Babiloni [36]           | x                          |                                    |                | n.a.                                     |                       |                |                             | x                                 | x                     |          |                | x                                     |                                       | x              | x                           | x                                 |              |           |                | x                                                  |    |                                   |                                               | x                                |
| Babiloni [37]           | x                          |                                    |                | n.a.                                     |                       |                |                             | x                                 | x                     |          |                |                                       |                                       | x              | x                           | x                                 | x            |           |                | x                                                  |    |                                   |                                               | x                                |
| Babiloni [38]           | x                          |                                    |                | x                                        |                       |                |                             | x                                 |                       | x        |                | x                                     | x                                     | x              | x                           | x                                 |              |           |                | x                                                  |    |                                   |                                               | x                                |
| Babiloni [39]           | x                          |                                    |                | n.a.                                     |                       |                |                             | x                                 | x                     |          |                |                                       |                                       | x              | x                           | x                                 |              |           |                | x                                                  |    |                                   |                                               | x                                |
| Babiloni [40]           | x                          |                                    |                | x                                        |                       |                |                             | x                                 | x                     |          |                |                                       |                                       | x              | x                           |                                   |              | x         |                | x                                                  |    |                                   |                                               | x                                |
| Babiloni [41]           | x                          |                                    |                | x                                        |                       |                |                             | x                                 |                       | x        |                | x                                     |                                       | x              | x                           | x                                 |              |           |                | x                                                  |    |                                   |                                               | x                                |
| Babiloni [42]           | x                          |                                    |                | x                                        |                       |                |                             | x                                 | x                     |          |                | x                                     | x                                     | x              | x                           | x                                 |              |           |                | x                                                  |    | x                                 |                                               |                                  |
| Bonanni [43]            | x                          |                                    |                |                                          | x                     |                |                             | x                                 | x                     |          |                | x                                     | x                                     | x              | x                           | x                                 |              |           |                | x                                                  |    |                                   |                                               | x                                |
| Bousleiman [44]         | x                          |                                    |                | n.a.                                     |                       |                |                             | x                                 | x                     |          |                |                                       |                                       | x              | x                           |                                   |              |           | x              |                                                    | x  |                                   |                                               | x                                |
| Cantero [45]            | x                          |                                    |                | n.a.                                     |                       |                |                             | x                                 | x                     |          |                | x                                     | x                                     |                | x                           | x                                 |              |           | x              |                                                    | x  |                                   |                                               | x                                |
| Caravaglios [46]        | x                          |                                    |                | n.a.                                     |                       |                |                             | x                                 | x                     |          |                |                                       |                                       | x              | x                           |                                   |              |           | x              |                                                    | x  |                                   |                                               | x                                |
| Carmona Arroyave [47]   | x                          |                                    |                | n.a.                                     |                       |                |                             | x                                 | x                     |          |                | x                                     | x                                     |                | x                           | x                                 |              |           | x              |                                                    | x  |                                   |                                               | x                                |
| Caviness [48]           | x                          |                                    |                | n.a.                                     |                       |                | x                           |                                   | x                     |          |                | x                                     |                                       |                |                             |                                   |              |           | x              |                                                    | x  |                                   |                                               | x                                |
| Caviness [49]           | x                          |                                    |                | n.a.                                     |                       |                | x                           |                                   | x                     |          |                |                                       |                                       | x              | x                           |                                   |              |           | x              |                                                    | x  |                                   |                                               | x                                |
| Chaturvedi [50]         | x                          |                                    |                | n.a.                                     |                       |                |                             | x                                 | x                     |          |                |                                       |                                       | x              | x                           |                                   |              |           | x              |                                                    | x  |                                   |                                               | x                                |
| Dauwels [51]            |                            |                                    | x              |                                          | x                     |                |                             | x                                 |                       | x        |                | ?                                     | ?                                     | x              | x                           |                                   |              | x         |                | x                                                  |    |                                   | x                                             |                                  |
| Deiber [52]             | x                          |                                    |                | n.a.                                     |                       |                |                             | x                                 | x                     |          |                | x                                     |                                       |                | x                           | x                                 |              |           | x              |                                                    | x  |                                   |                                               | x                                |
| Fodor [53]              | x                          |                                    |                | n.a.                                     |                       |                |                             | x                                 | x                     |          |                | x                                     |                                       |                | x                           | x                                 |              |           | x              |                                                    | x  |                                   | x                                             |                                  |
| Fonseca [54]            | x                          |                                    |                | n.a.                                     |                       |                |                             | x                                 | x                     |          |                | x                                     |                                       |                | x                           | x                                 |              |           | x              |                                                    | x  |                                   |                                               | x                                |
| Fraga [55]              | x                          |                                    |                | n.a.                                     |                       |                |                             | x                                 | x                     |          |                | x                                     |                                       |                | x                           | x                                 |              |           | x              |                                                    | x  |                                   |                                               | x                                |
| Gonzalez-Escamilla [56] | x                          |                                    |                | n.a.                                     |                       |                |                             | x                                 | x                     |          |                | x                                     |                                       |                | x                           | x                                 |              |           | x              |                                                    | x  |                                   |                                               | x                                |
| Goodman [57]            | x                          |                                    |                | n.a.                                     |                       |                |                             | x                                 | x                     |          |                |                                       |                                       | x              | x                           |                                   |              |           | x              |                                                    | x  |                                   |                                               | x                                |
| Gouw [58]               | x                          |                                    |                | x                                        |                       |                |                             | x                                 | n.a.                  |          |                | n.a.                                  |                                       |                | x                           | x                                 |              |           | x              |                                                    | x  |                                   |                                               | x                                |
| He [59]                 | x                          |                                    |                | n.a.                                     |                       |                |                             | x                                 | x                     |          |                |                                       |                                       | x              |                             |                                   |              |           | x              |                                                    | x  |                                   |                                               | x                                |

|                                |         |         |         |      |            |   |   |      |   |      |   |   |   |   |   |   |   |   |   |                           |
|--------------------------------|---------|---------|---------|------|------------|---|---|------|---|------|---|---|---|---|---|---|---|---|---|---------------------------|
| Hsiao [60]                     | x       |         |         | n.a. |            | x |   | n.a. |   | n.a. |   | x |   |   | x | x |   |   |   | x                         |
| Hsiao [61]                     | x       |         |         | n.a. |            | x |   | n.a. |   | n.a. |   | x |   |   | x | x |   |   |   | x                         |
| Huang [62]                     |         | x       |         | n.a. | x          |   | x |      |   |      | x | x | x |   | x | x |   |   |   | x                         |
| Jelic [63]                     | x       |         |         | n.a. | x          |   | x |      |   |      | x | x | x |   | x | x |   |   |   | x                         |
| Jelic [64]                     | x       |         |         | n.a. |            | x | x |      |   |      | x | x | x | x |   | x |   |   |   | x                         |
| Koenig (NY sample) [65]        | x (AD)  | x (MCI) |         | n.a. | x          |   | x |      |   | x    | x |   |   | x |   | x | x |   |   | x                         |
| Koenig (Stockholm sample) [65] | x       |         |         | n.a. | x          |   | x |      |   | ?    | ? |   |   | x |   | x | x |   |   | x                         |
| Kurt [66]                      | x       |         |         | n.a. | x          |   |   |      | x | x    |   |   |   | x | x |   | x | x |   | x                         |
| Kwak [67]                      | x       |         |         | n.a. |            | x |   |      | x |      |   |   | x | x |   | x | x |   |   | x                         |
| Luckhaus [68]                  | x       |         |         | n.a. |            | x |   | n.a. |   | n.a. |   | x | x |   | x | x |   |   |   | x                         |
| Mazaheri [69]                  | x       |         |         | n.a. |            | x |   | n.a. |   | n.a. |   |   |   |   | x | x |   |   |   | x                         |
| McBride [70]                   |         | x       |         | n.a. |            | x | x |      |   |      |   | x |   |   | x | x |   |   |   | x                         |
| Michels [71]                   |         |         | x       | n.a. |            | x |   |      | x |      |   | x | x |   | x | x |   | x |   |                           |
| Moretti [72]                   | x       |         |         | n.a. |            | x | x |      |   |      |   | x | x |   | x | x |   |   |   | x                         |
| Moretti [73]                   | x (FTD) |         | x (MCI) |      |            | x |   | n.a. |   | n.a. |   | x | x |   | x | x |   |   |   | x                         |
| Mostile [74]                   | x       |         |         | n.a. | x          |   | x |      |   |      |   | x |   |   | x | x |   |   |   | x                         |
| Musaeus [75]                   | x       |         |         | n.a. | x (mostly) |   | x |      |   | x    |   | x | x | x | x |   |   | x |   |                           |
| Musaeus [76]                   | x       |         |         | n.a. | x (mostly) |   | x |      |   | x    |   | x | x | x | x |   |   |   |   | x (control analyses done) |
| Musaeus [77]                   | x       |         |         | n.a. | x          |   | x |      |   | x    | x |   |   | x | x |   |   | x |   |                           |
| Musaeus [78]                   | x       |         |         | n.a. | x          |   | x |      |   | x    | x |   |   | x | x |   |   | x |   |                           |
| Nguyen [79]                    | x       |         |         | n.a. |            | x |   |      | x | x    | x |   |   | x | x |   |   | x |   |                           |
| Núñez [80]                     | x       |         | x       |      |            | x |   |      | x |      |   | x |   |   | x | x |   |   |   | x                         |
| Pijnenburg [81]                | x       |         |         | n.a. | x          |   |   | n.a. |   | n.a. |   | x |   |   | x | x |   |   |   | x                         |
| Poil [82]                      | x       |         |         | n.a. |            | x |   | n.a. |   | n.a. |   | x |   |   | x | x |   |   |   | x                         |
| Pons [83]                      | x       |         |         | n.a. |            | x |   |      | x | x    | x |   |   | x |   | x | x |   |   | x                         |
| Poza [84]                      | x       |         | x       |      |            | x |   |      | x | ?    | ? |   |   | x | x |   |   |   |   | x                         |
| Prieto del Val [85]            | x       |         | x       |      |            | x | x |      |   | x    | x |   |   | x | x |   |   |   | x |                           |
| Roh [86]                       | x       |         |         | n.a. |            | x | x |      |   |      |   | x |   |   | x | x |   | x |   |                           |
| Rossini [87]                   | x       |         |         | n.a. |            | x |   | n.a. |   | n.a. |   | x | x |   | x | x |   |   |   | x                         |
| Ruiz-Gómez [88]                | x       |         | x       |      |            | x |   |      | x | x    |   |   |   | x |   | x | x |   |   | x                         |
| Scrascia [89]                  | x       |         |         | n.a. |            | x |   | n.a. |   | n.a. |   | x | x | x | x |   |   |   |   | x                         |
| Sharma [90]                    |         | x       |         | n.a. |            | x | x |      |   |      |   | x | x |   | x | x |   |   |   | x                         |
| Smailovic [91]                 | x       |         |         | n.a. |            | x |   | n.a. |   | n.a. |   | x | x |   | x | x |   |   |   | x                         |
| Stam [92]                      | x       |         |         | n.a. | x          |   |   | n.a. |   | n.a. |   | x |   |   | x | x |   |   |   | x                         |
| Teipel [93]                    | x       |         |         | n.a. |            | x | x |      |   | x    | x |   |   | x |   | x | x |   |   | x                         |
| Utianski [94]                  | x       |         |         | n.a. |            | x | x |      |   | x    |   |   |   | x |   | x | x |   |   | x                         |
| van der Hiele [95]             | x       |         |         | n.a. | x          |   | x |      |   | x    |   |   |   | x | x |   |   |   | x |                           |
| van der Hiele [96]             | x       |         |         | n.a. |            | x | x |      |   |      | x |   |   | x | x |   |   |   | x |                           |
| van der Hiele [97]             | x       |         |         | n.a. |            | x | x |      |   |      | x |   |   | x | x |   |   |   |   | x                         |
| Vecchio [98]                   | x       |         |         | n.a. |            | x |   |      | x |      |   | x | x |   | x | x |   |   | x |                           |

|             |   |  |  |      |  |   |   |  |  |   |   |   |   |   |  |  |   |   |  |  |   |   |
|-------------|---|--|--|------|--|---|---|--|--|---|---|---|---|---|--|--|---|---|--|--|---|---|
| Wen [99]    | x |  |  | n.a. |  | x | x |  |  |   | x | x | x | x |  |  | x | x |  |  |   | x |
| Xu [100]    | x |  |  | n.a. |  | x | x |  |  | x | x |   | x | x |  |  | x | x |  |  | x |   |
| Ya [101]    | x |  |  | x    |  |   |   |  |  | x | ? |   | x |   |  |  | x | x |  |  |   | x |
| Yener [102] | x |  |  | n.a. |  | x |   |  |  |   |   | x | x | x |  |  | x | x |  |  |   | x |
| Yener [103] | x |  |  | n.a. |  | x | x |  |  | x |   |   | x | x |  |  | x | x |  |  |   | x |

Question marks indicate that information was unclear. n.a., not applicable.

## REFERENCES

- [1] Babiloni C, Benussi L, Binetti G, Bosco P, Busonero G, Cesaretti S, Dal Forno G, Del Percio C, Ferri R, Frisoni G, Ghidoni R (2006) Genotype (cystatin C) and EEG phenotype in Alzheimer disease and mild cognitive impairment: a multicentric study. *Neuroimage* **29**, 948-964.
- [2] Babiloni C, Benussi L, Binetti G, Cassetta E, Dal Forno G, Del Percio C, Ferreri F, Ferri R, Frisoni G, Ghidoni R, Miniussi C (2006) Apolipoprotein E and alpha brain rhythms in mild cognitive impairment: a multicentric electroencephalogram study. *Ann Neurol* **59**, 323-34.
- [3] Babiloni C, Binetti G, Cassetta E, Dal Forno G, Del Percio C, Ferreri F, Ferri R, Frisoni G, Hirata K, Lanuzza B, Miniussi C (2006) Sources of cortical rhythms change as a function of cognitive impairment in pathological aging: a multicenter study. *Clin Neurophysiol* **117**, 252-268.
- [4] Babiloni C, Cassetta E, Binetti G, Tombini M, Del Percio C, Ferreri F, Ferri R, Frisoni G, Lanuzza B, Nobili F, Parisi L (2007) Resting EEG sources correlate with attentional span in mild cognitive impairment and Alzheimer's disease. *Eur J Neurosci* **25**, 3742-3757.
- [5] Babiloni C, Del Percio C, Boccardi M, Lizio R, Lopez S, Carducci F, Marzano N, Soricelli A, Ferri R, Triggiani AI, Prestia A (2015) Occipital sources of resting-state alpha rhythms are related to local gray matter density in subjects with amnesic mild cognitive impairment and Alzheimer's disease. *Neurobiol Aging* **36**, 556-570.
- [6] Babiloni C, Del Percio C, Lizio R, Marzano N, Infarinato F, Soricelli A, Salvatore E, Ferri R, Bonforte C, Tedeschi G, Montella P (2014) Cortical sources of resting state electroencephalographic alpha rhythms deteriorate across time in subjects with amnesic mild cognitive impairment. *Neurobiol Aging* **35**, 130-142.

- [7] Babiloni C, Del Percio C, Lizio R, Noce G, Cordone S, Lopez S, Soricelli A, Ferri R, Pascarelli MT, Nobili F, Arnaldi D (2017) Abnormalities of cortical neural synchronization mechanisms in subjects with mild cognitive impairment due to Alzheimer's and Parkinson's diseases: an EEG study. *J Alzheimers Dis* **59**, 339-358.
- [8] Babiloni C, Ferri R, Binetti G, Cassarino A, Dal Forno G, Ercolani M, Ferreri F, Frisoni GB, Lanuzza B, Miniussi C, Nobili F (2006) Fronto-parietal coupling of brain rhythms in mild cognitive impairment: a multicentric EEG study. *Brain Res Bull* **69**, 63-73.
- [9] Babiloni C, Frisoni GB, Pievani M, Toscano L, Del Percio C, Geroldi C, Eusebi F, Miniussi C, Rossini PM (2008) White-matter vascular lesions correlate with alpha EEG sources in mild cognitive impairment. *Neuropsychologia* **46**, 1707-1720.
- [10] Babiloni C, Frisoni GB, Pievani M, Vecchio F, Infarinato F, Geroldi C, Salinari S, Ferri R, Fracassi C, Eusebi F, Rossini PM (2008) White matter vascular lesions are related to parietal-to-frontal coupling of EEG rhythms in mild cognitive impairment. *Hum Brain Mapp* **29**, 1355-1367.
- [11] Babiloni C, Frisoni GB, Pievani M, Vecchio F, Lizio R, Buttiglione M, Geroldi C, Fracassi C, Eusebi F, Ferri R, Rossini PM (2009) Hippocampal volume and cortical sources of EEG alpha rhythms in mild cognitive impairment and Alzheimer disease. *Neuroimage* **44**, 123-135.
- [12] Babiloni C, Frisoni G, Steriade M, Bresciani L, Binetti G, Del Percio C, Geroldi C, Miniussi C, Nobili F, Rodriguez G, Zappasodi F (2006) Frontal white matter volume and delta EEG sources negatively correlate in awake subjects with mild cognitive impairment and Alzheimer's disease. *Clin Neurophysiol* **117**, 1113-1129.
- [13] Babiloni C, Frisoni GB, Vecchio F, Lizio R, Pievani M, Cristina G, Fracassi C, Vernieri F, Rodriguez G, Nobili F, Ferri R (2011) Stability of clinical condition in mild cognitive

- impairment is related to cortical sources of alpha rhythms: an electroencephalographic study. *Hum Brain Mapp* **32**, 1916-1931.
- [14] Babiloni C, Frisoni GB, Vecchio F, Pievani M, Geroldi C, De Carli C, Ferri R, Vernieri F, Lizio R, Rossini PM (2011) Global functional coupling of resting EEG rhythms is related to white-matter lesions along the cholinergic tracts in subjects with amnesic mild cognitive impairment. *J Alzheimers Dis* **19**, 859-871.
- [15] Babiloni C, Lizio R, Carducci F, Vecchio F, Redolfi A, Marino S, Tedeschi G, Montella P, Guizzaro A, Esposito F, Bozzao A (2011) Resting state cortical electroencephalographic rhythms and white matter vascular lesions in subjects with Alzheimer's disease: an Italian multicenter study. *J Alzheimers Dis* **26**, 331-346.
- [16] Babiloni C, Lizio R, Vecchio F, Frisoni GB, Pievani M, Geroldi C, Claudia F, Ferri R, Lanuzza B, Rossini PM (2010) Reactivity of cortical alpha rhythms to eye opening in mild cognitive impairment and Alzheimer's disease: an EEG study. *J Alzheimers Dis* **22**, 1047-1064.
- [17] Babiloni C, Pievani M, Vecchio F, Geroldi C, Eusebi F, Fracassi C, Fletcher E, De Carli C, Boccardi M, Rossini PM, Frisoni GB (2009) White-matter lesions along the cholinergic tracts are related to cortical sources of EEG rhythms in amnesic mild cognitive impairment. *Hum Brain Mapp* **30**, 1431-1443.
- [18] Babiloni C, Squitti R, Del Percio C, Cassetta E, Ventriglia MC, Ferreri F, Tombini M, Frisoni G, Binetti G, Gurzi M, Salinari S (2007) Free copper and resting temporal EEG rhythms correlate across healthy, mild cognitive impairment, and Alzheimer's disease subjects. *Clin Neurophysiol* **118**, 1244-1260.
- [19] Babiloni C, Visser PJ, Frisoni G, De Deyn PP, Bresciani L, Jelic V, Nagels G, Rodriguez G, Rossini PM, Vecchio F, Colombo D (2010) Cortical sources of resting EEG rhythms



- in mild cognitive impairment and subjective memory complaint. *Neurobiol Aging* **31**, 1787-1798.
- [20] Lizio R, Babiloni C, Del Percio C, Losurdo A, Vernò L, De Tommaso M, Montemurno A, Dalfino G, Cirillo P, Soricelli A, Ferri R (2018) Different abnormalities of cortical neural synchronization mechanisms in patients with mild cognitive impairment due to Alzheimer's and chronic kidney diseases: An EEG study. *J Alzheimers Dis* **65**, 897-915.
- [21] Rossini PM, Buscema M, Capriotti M, Grossi E, Rodriguez G, Del Percio C, Babiloni C (2008) Is it possible to automatically distinguish resting EEG data of normal elderly vs. mild cognitive impairment subjects with high degree of accuracy? *Clin Neurophysiol* **119**, 1534-1545.
- [22] van der Hiele K, Bollen EL, Vein AA, Reijntjes RH, Westendorp RG, van Buchem MA, Middelkoop HA, van Dijk JG (2008) EEG markers of future cognitive performance in the elderly. *J Clin Neurophysiol* **25**, 83-89.
- [23] van der Hiele K, Vein AA, van der Welle A, van der Grond J, Westendorp RG, Bollen EL, Van Buchem MA, Van Dijk JG, Middelkoop HA (2007) EEG and MRI correlates of mild cognitive impairment and Alzheimer's disease. *Neurobiol Aging* **28**, 1322-1329.
- [24] Prieto del Val L, Cantero JL, Atienza M (2015) APOE  $\epsilon$ 4 constrains engagement of encoding-related compensatory networks in amnesic mild cognitive impairment. *Hippocampus* **25**, 993-1007.
- [25] Gonzalez-Escamilla G, Atienza M, Cantero JL (2015) Impaired cortical oscillatory coupling in mild cognitive impairment: anatomical substrate and ApoE4 effects. *Brain Struct Funct* **220**, 1721-1737.
- [26] Vialatte FB, Dauwels J, Maurice M, Musha T, Cichocki A (2011) Improving the specificity of EEG for diagnosing Alzheimer's disease. *Int J Alzheimers Dis* **2011**, 259069.

- [27] Reilly TJ, Nottage JF, Studerus E, Rutigliano G, De Micheli AI, Fusar-Poli P, McGuire P (2018) Gamma band oscillations in the early phase of psychosis: a systematic review. *Neurosci Biobehav Rev* **90**, 381-399.
- [28] Albert MS, DeKosky ST, Dickson D, Dubois B, Feldman HH, Fox NC, Gamst A, Holtzman DM, Jagust WJ, Petersen RC, Snyder PJ (2011) The diagnosis of mild cognitive impairment due to Alzheimer's disease: recommendations from the National Institute on Aging-Alzheimer's Association workgroups on diagnostic guidelines for Alzheimer's disease. *Alzheimers Dement* **7**, 270-279.
- [29] Litvan I, Goldman JG, Tröster AI, Schmand BA, Weintraub D, Petersen RC, Mollenhauer B, Adler CH, Marder K, Williams-Gray CH, Aarsland D (2012) Diagnostic criteria for mild cognitive impairment in Parkinson's disease: Movement Disorder Society Task Force guidelines. *Mov Disord* **27**, 349-356.
- [30] Petersen RC, Smith GE, Waring SC, Ivnik RJ, Tangalos EG, Kokmen E (1999) Mild cognitive impairment: clinical characterization and outcome. *Arch Neurol* **56**, 303-308.
- [31] Petersen RC, Doody R, Kurz A, Mohs RC, Morris JC, Rabins PV, Ritchie K, Rossor M, Thal L, Winblad B (2001) Current concepts in mild cognitive impairment. *Arch Neurol* **58**, 1985-1992.
- [32] Winblad B, Palmer K, Kivipelto M, Jelic V, Fratiglioni L, Wahlund LO, Nordberg A, Bäckman L, Albert M, Almkvist O, Arai H (2004) Mild cognitive impairment—beyond controversies, towards a consensus: report of the International Working Group on Mild Cognitive Impairment. *J Intern Med* **256**, 240-246.
- [33] McKhann G, Drachman D, Folstein M, Katzman R, Price D, Stadlan EM (1984) Clinical diagnosis of Alzheimer's disease: Report of the NINCDS-ADRDA Work Group\* under the auspices of Department of Health and Human Services Task Force on Alzheimer's Disease. *Neurology* **34**, 939-944.

- [34] McKhann GM, Knopman DS, Chertkow H, Hyman BT, Jack Jr CR, Kawas CH, Klunk WE, Koroshetz WJ, Manly JJ, Mayeux R, Mohs RC (2011) The diagnosis of dementia due to Alzheimer's disease: recommendations from the National Institute on Aging-Alzheimer's Association workgroups on diagnostic guidelines for Alzheimer's disease. *Alzheimers Dement* **7**, 263-269.
- [35] McKeith IG, Dickson DW, Lowe J, Emre M, O'Brien JT, Feldman H, Cummings J, Duda JE, Lippa C, Perry EK, Aarsland D (2005) Diagnosis and management of dementia with Lewy bodies: third report of the DLB Consortium. *Neurology* **65**, 1863-1872.
- [36] Babiloni C, Carducci F, Lizio R, Vecchio F, Baglieri A, Bernardini S, Cavedo E, Bozzao A, Buttinelli C, Esposito F, Giubilei F (2013) Resting state cortical electroencephalographic rhythms are related to gray matter volume in subjects with mild cognitive impairment and Alzheimer's disease. *Hum Brain Mapp* **34**, 1427-1446.
- [37] Babiloni C, Ferri R, Binetti G, Vecchio F, Frisoni GB, Lanuzza B, Miniussi C, Nobili F, Rodriguez G, Rundo F, Cassarino A (2009) Directionality of EEG synchronization in Alzheimer's disease subjects. *Neurobiol Aging* **30**, 93-102.
- [38] Babiloni C, Del Percio C, Lizio R, Noce G, Lopez S, Soricelli A, Ferri R, Pascarelli MT, Catania V, Nobili F, Arnaldi D (2018) Functional cortical source connectivity of resting state electroencephalographic alpha rhythms shows similar abnormalities in patients with mild cognitive impairment due to Alzheimer's and Parkinson's diseases. *Clin Neurophysiol* **129**, 766-782.
- [39] Babiloni C, Frisoni G, Vecchio F, Lizio R, Pievani M, Geroldi C, Fracassi C, Vernieri F, Ursini F, Rodriguez G, Nobili F (2009) Global functional coupling of resting EEG rhythms is abnormal in mild cognitive impairment and Alzheimer's disease: a multicenter EEG study. *J Psychophysiol* **23**, 224-234.

- [40] Babiloni C, Del Percio C, Lizio R, Noce G, Lopez S, Soricelli A, Ferri R, Pascarelli MT, Catania V, Nobili F, Arnaldi D (2019) Levodopa may affect cortical excitability in Parkinson's disease patients with cognitive deficits as revealed by reduced activity of cortical sources of resting state electroencephalographic rhythms. *Neurobiol Aging* **73**, 9-20.
- [41] Babiloni C, Del Percio C, Lizio R, Noce G, Lopez S, Soricelli A, Ferri R, Pascarelli MT, Catania V, Nobili F, Arnaldi D (2018) Abnormalities of resting state cortical EEG rhythms in subjects with mild cognitive impairment due to Alzheimer's and Lewy body diseases. *J Alzheimers Dis* **62**, 247-268.
- [42] Babiloni C, Del Percio C, Pascarelli MT, Lizio R, Noce G, Lopez S, Rizzo M, Ferri R, Soricelli A, Nobili F, Arnaldi D (2019) Abnormalities of functional cortical source connectivity of resting-state electroencephalographic alpha rhythms are similar in patients with mild cognitive impairment due to Alzheimer's and Lewy body diseases. *Neurobiol Aging* **77**, 112-127.
- [43] Bonanni L, Perfetti B, Bifulchetti S, Taylor JP, Franciotti R, Parnetti L, Thomas A, Onofrj M (2015) Quantitative electroencephalogram utility in predicting conversion of mild cognitive impairment to dementia with Lewy bodies. *Neurobiol Aging* **36**, 434-445.
- [44] Bousleiman H, Zimmermann R, Ahmed S, Hardmeier M, Hatz F, Schindler C, Roth V, Gschwandtner U, Fuhr P (2014) Power spectra for screening parkinsonian patients for mild cognitive impairment. *Ann Clin Transl Neurol* **1**, 884-890.
- [45] Cantero JL, Atienza M, Cruz-Vadell A, Suarez-Gonzalez A, Gil-Neciga E (2009) Increased synchronization and decreased neural complexity underlie thalamocortical oscillatory dynamics in mild cognitive impairment. *Neuroimage* **46**, 938-948.

- [46] Caravaglios G, Muscoso EG, Di Maria G, Costanzo E (2015) Patients with mild cognitive impairment have an abnormal upper-alpha event-related desynchronization/synchronization (ERD/ERS) during a task of temporal attention. *J Neural Transm* **122**, 441-453.
- [47] Carmona Arroyave JA, Tobón Quintero CA, Suárez Revelo JJ, Ochoa Gómez JF, García YB, Gómez LM, Pineda Salazar DA (2019) Resting functional connectivity and mild cognitive impairment in Parkinson's disease. An electroencephalogram study. *Future Neurol* **14**, FNL18.
- [48] Caviness JN, Hentz JG, Evidente VG, Driver-Dunckley E, Samanta J, Mahant P, Connor DJ, Sabbagh MN, Shill HA, Adler CH (2007) Both early and late cognitive dysfunction affects the electroencephalogram in Parkinson's disease. *Parkinsonism Relat Disord* **13**, 348-354.
- [49] Caviness JN, Utianski RL, Hentz JG, Beach TG, Dugger BN, Shill HA, Driver-Dunckley ED, Sabbagh MN, Mehta S, Adler CH (2015) Differential spectral quantitative electroencephalography patterns between control and Parkinson's disease cohorts. *Eur J Neurol* **23**, 387-392.
- [50] Chaturvedi M, Bogaarts JG, Kozak VV, Hatz F, Gschwandtner U, Meyer A, Fuhr P, Roth V (2019) Phase lag index and spectral power as QEEG features for identification of patients with mild cognitive impairment in Parkinson's disease. *Clin Neurophysiol* **130**, 1937-1944.
- [51] Dauwels J, Srinivasan K, Ramasubba Reddy M, Musha T, Vialatte FB, Latchoumane C, Jeong J, Cichocki A (2011) Slowing and loss of complexity in Alzheimer's EEG: two sides of the same coin? *Int J Alzheimers Dis* **2011**, 539621.
- [52] Deiber MP, Ibáñez V, Herrmann F, Rodriguez C, Emch J, Missonnier P, Millet P, Gold G, Giannakopoulos P (2011) Face short-term memory-related electroencephalographic

- patterns can differentiate multi-versus single-domain amnesic mild cognitive impairment. *J Alzheimers Dis* **26**, 157-169.
- [53] Fodor Z, Sirály E, Horváth A, Salacz P, Hidasi Z, Csibri É, Szabó Á, Csukly G (2018) Decreased event-related beta synchronization during memory maintenance marks early cognitive decline in mild cognitive impairment. *J Alzheimers Dis* **63**, 489-502.
- [54] Fonseca LC, Tedrus GMAS, Letro GH, Bossoni AS (2009) Dementia, mild cognitive impairment and quantitative EEG in patients with Parkinson's disease. *Clin EEG Neurosci* **40**, 168-172.
- [55] Fraga FJ, Mamani GQ, Johns E, Tavares G, Falk TH, Phillips NA (2018) Early diagnosis of mild cognitive impairment and Alzheimer's with event-related potentials and event-related desynchronization in N-back working memory tasks. *Comput Methods Programs Biomed* **164**, 1-13.
- [56] Gonzalez-Escamilla G, Atienza M, Garcia-Solis D, Cantero JL (2016) Cerebral and blood correlates of reduced functional connectivity in mild cognitive impairment. *Brain Struct Funct* **221**, 631-645.
- [57] Goodman MS, Zomorodi R, Kumar S, Barr MS, Daskalakis ZJ, Blumberger DM, Fischer CE, Flint A, Mah L, Herrmann N, Pollock BG (2019) Changes in theta but not alpha modulation are associated with impairment in working memory in Alzheimer's disease and mild cognitive impairment. *J Alzheimers Dis* **68**, 1085-1094.
- [58] Gouw AA, Alsema AM, Tijms BM, Borta A, Scheltens P, Stam CJ, van der Flier WM (2017) EEG spectral analysis as a putative early prognostic biomarker in nondemented, amyloid positive subjects. *Neurobiol Aging* **57**, 133-142.
- [59] He X, Zhang Y, Chen J, Xie C, Gan R, Wang L, Wang L (2017) Changes in theta activities in the left posterior temporal region, left occipital region and right frontal

region related to mild cognitive impairment in Parkinson's disease patients. *Int J Neurosci* **127**, 66-72.

- [60] Hsiao FJ, Wang YJ, Yan SH, Chen WT, Lin YY (2013) Altered oscillation and synchronization of default-mode network activity in mild Alzheimer's disease compared to mild cognitive impairment: an electrophysiological study. *PloS One* **8**, e68792.
- [61] Hsiao FJ, Chen WT, Wang YJ, Yan SH, Lin YY (2014) Altered source-based EEG coherence of resting-state sensorimotor network in early-stage Alzheimer's disease compared to mild cognitive impairment. *Neurosci Lett* **558**, 47-52.
- [62] Huang C, Wahlund LO, Dierks T, Julin P, Winblad B, Jelic V (2000) Discrimination of Alzheimer's disease and mild cognitive impairment by equivalent EEG sources: a cross-sectional and longitudinal study. *Clin Neurophysiol* **111**, 1961-1967.
- [63] Jelic V, Shigeta M, Julin P, Almkvist O, Winblad B, Wahlund LO (1996) Quantitative electroencephalography power and coherence in Alzheimer's disease and mild cognitive impairment. *Dement Geriatr Cogn Disord* **7**, 314-323.
- [64] Jelic V, Johansson SE, Almkvist O, Shigeta M, Julin P, Nordberg A, Winblad B, Wahlund LO (2000) Quantitative electroencephalography in mild cognitive impairment: longitudinal changes and possible prediction of Alzheimer's disease. *Neurobiol Aging* **21**, 533-540.
- [65] Koenig T, Prichep L, Dierks T, Hubl D, Wahlund LO, John ER, Jelic V (2005) Decreased EEG synchronization in Alzheimer's disease and mild cognitive impairment. *Neurobiol Aging* **26**, 165-171.
- [66] Kurt P, Emek-Savaş DD, Batum K, Turp B, Güntekin B, Karşıdağ S, Yener GG (2014) Patients with mild cognitive impairment display reduced auditory event-related delta oscillatory responses. *Behav Neurol* **2014**, 268967.

- [67] Kwak YT (2006) Quantitative EEG findings in different stages of Alzheimer's disease. *J Clin Neurophysiol* **23**, 457-462.
- [68] Luckhaus C, Grass-Kapanke B, Blaeser I, Ihl R, Supprian T, Winterer G, Zielasek J, Brinkmeyer J (2008) Quantitative EEG in progressing vs stable mild cognitive impairment (MCI): results of a 1-year follow-up study. *Int J Geriatr Psychiatry* **23**, 1148-1155.
- [69] Mazaheri A, Segaert K, Olichney J, Yang JC, Niu YQ, Shapiro K, Bowman H (2018) EEG oscillations during word processing predict MCI conversion to Alzheimer's disease. *Neuroimage Clin* **17**, 188-197.
- [70] McBride JC, Zhao X, Munro NB, Smith CD, Jicha GA, Hively L, Broster LS, Schmitt FA, Kryscio RJ, Jiang Y (2014) Spectral and complexity analysis of scalp EEG characteristics for mild cognitive impairment and early Alzheimer's disease. *Comput Methods Programs Biomed* **114**, 153-163.
- [71] Michels L, Muthuraman M, Anwar AR, Kollias S, Leh SE, Riese F, Unschuld PG, Siniatchkin M, Gietl AF, Hock C (2017) Changes of functional and directed resting-state connectivity are associated with neuronal oscillations, ApoE genotype and amyloid deposition in mild cognitive impairment. *Front Aging Neurosci* **9**, 304.
- [72] Moretti DV, Frisoni GB, Pievani M, Rosini S, Geroldi C, Binetti G, Rossini PM (2008) Cerebrovascular disease and hippocampal atrophy are differently linked to functional coupling of brain areas: an EEG coherence study in MCI subjects. *J Alzheimers Dis* **14**, 285-299.
- [73] Moretti DV, Benussi L, Fostinelli S, Ciani M, Binetti G, Ghidoni R (2016) Progranulin mutations affects brain oscillatory activity in fronto-temporal dementia. *Front Aging Neurosci* **8**, 35.



- [74] Mostile G, Giuliano L, Monastero R, Luca A, Cicero CE, Donzuso G, Dibilio V, Baschi R, Terranova R, Restivo V, Sofia V (2019) Electro cortical networks in Parkinson's disease patients with Mild Cognitive Impairment. The PaCoS study. *Parkinsonism Relat Disord* **64**, 156-162.
- [75] Musaeus CS, Engedal K, Høgh P, Jelic V, Mørup M, Naik M, Oeksengaard AR, Snaedal J, Wahlund LO, Waldemar G, Andersen BB (2018) EEG theta power is an early marker of cognitive decline in dementia due to Alzheimer's disease. *J Alzheimers Dis* **64**, 1359-1371.
- [76] Musaeus CS, Engedal K, Høgh P, Jelic V, Mørup M, Naik M, Oeksengaard AR, Snaedal J, Wahlund LO, Waldemar G, Andersen BB (2019) Oscillatory connectivity as a diagnostic marker of dementia due to Alzheimer's disease. *Clin Neurophysiol* **130**, 1889-1899.
- [77] Musaeus CS, Nielsen MS, Østerbye NN, Høgh P (2018) Decreased parietal beta power as a sign of disease progression in patients with mild cognitive impairment. *J Alzheimers Dis* **65**, 475-487.
- [78] Musaeus CS, Nielsen MS, Høgh P (2019) Altered low-frequency EEG connectivity in mild cognitive impairment as a sign of clinical progression. *J Alzheimers Dis* **68**, 947-960.
- [79] Nguyen LT, Mudar RA, Chiang HS, Schneider JM, Maguire MJ, Kraut MA, Hart Jr J (2017) Theta and alpha alterations in amnesic mild cognitive impairment in semantic Go/NoGo tasks. *Front Aging Neurosci* **9**, 160.
- [80] Núñez P, Poza J, Gómez C, Rodríguez-González V, Hillebrand A, Tola-Arribas MA, Cano M, Hornero R (2019) Characterizing the fluctuations of dynamic resting-state electrophysiological functional connectivity: Reduced neuronal coupling variability in

mild cognitive impairment and dementia due to Alzheimer's disease. *J Neural Eng* **16**, 056030.

- [81] Pijnenburg YA, van der Made Y, van Cappellen-van Walsum AM, Knol DL, Scheltens P, Stam CJ (2004) EEG synchronization likelihood in mild cognitive impairment and Alzheimer's disease during a working memory task. *Clin Neurophysiol* **115**, 1332-1339.
- [82] Poil SS, de Haan W, van der Flier WM, Mansvelter HD, Scheltens P, Linkenkaer-Hansen K (2013) Integrative EEG biomarkers predict progression to Alzheimer's disease at the MCI stage. *Front Aging Neurosci* **5**, 58.
- [83] Pons AJ, Cantero JL, Atienza M, Garcia-Ojalvo J (2010) Relating structural and functional anomalous connectivity in the aging brain via neural mass modeling. *Neuroimage* **52**, 848-861.
- [84] Poza J, Gomez C, Garcia M, A Tola-Arribas M, Carreres A, Cano M, Hornero R (2017) Spatio-temporal fluctuations of neural dynamics in mild cognitive impairment and Alzheimer's disease. *Curr Alzheimer Res* **14**, 924-936.
- [85] Prieto del Val L, Cantero JL, Atienza M (2016) Atrophy of amygdala and abnormal memory-related alpha oscillations over posterior cingulate predict conversion to Alzheimer's disease. *Sci Rep* **6**, 31859.
- [86] Roh JH, Park MH, Ko D, Park KW, Lee DH, Han C, Jo SA, Yang KS, Jung KY (2011) Region and frequency specific changes of spectral power in Alzheimer's disease and mild cognitive impairment. *Clin Neurophysiol* **122**, 2169-2176.
- [87] Rossini PM, Del Percio C, Pasqualetti P, Cassetta E, Binetti G, Dal Forno G, Ferreri F, Frisoni G, Chiovenda P, Miniussi C, Parisi L (2006) Conversion from mild cognitive impairment to Alzheimer's disease is predicted by sources and coherence of brain electroencephalography rhythms. *Neuroscience* **143**, 793-803.

- [88] Ruiz-Gómez SJ, Hornero R, Poza J, Maturana-Candelas A, Pinto N, Gómez C (2019) Computational modeling of the effects of EEG volume conduction on functional connectivity metrics. Application to Alzheimer's disease continuum. *J Neural Eng* **16**, 066019.
- [89] Scrascia F, Curcio G, Ursini F, Trotta L, Quintiliani L, Migliore S, Altamura C, Pitocco F, Altavilla R, Melgari JM, Quattrocchi CC (2014) Relationship among diffusion tensor imaging, EEG activity, and cognitive status in mild cognitive impairment and Alzheimer's disease patients. *J Alzheimers Dis* **38**, 939-950.
- [90] Sharma N, Kolekar MH, Jha K, Kumar Y (2019) EEG and cognitive biomarkers based mild cognitive impairment diagnosis. *IRBM* **40**, 113-121.
- [91] Smailovic U, Koenig T, Kåreholt I, Andersson T, Kramberger MG, Winblad B, Jelic V (2018) Quantitative EEG power and synchronization correlate with Alzheimer's disease CSF biomarkers. *Neurobiol Aging* **63**, 88-95.
- [92] Stam CJ, van der Made Y, Pijnenburg YAL, Scheltens PH (2003) EEG synchronization in mild cognitive impairment and Alzheimer's disease. *Acta Neurol Scand* **108**, 90-96.
- [93] Teipel SJ, Pogarell O, Meindl T, Dietrich O, Sydykova D, Hunklinger U, Georgii B, Mulert C, Reiser MF, Möller HJ, Hampel H (2009) Regional networks underlying interhemispheric connectivity: an EEG and DTI study in healthy ageing and amnesic mild cognitive impairment. *Hum Brain Mapp* **30**, 2098-2119.
- [94] Utianski RL, Caviness JN, van Straaten EC, Beach TG, Dugger BN, Shill HA, Driver-Dunckley ED, Sabbagh MN, Mehta S, Adler CH, Hentz JG (2016) Graph theory network function in Parkinson's disease assessed with electroencephalography. *Clin Neurophysiol* **127**, 2228-2236.

- [95] van der Hiele K, Vein AA, Kramer CG, Reijntjes RH, van Buchem MA, Westendorp RG, Bollen EL, van Dijk JG, Middelkoop HA (2007) Memory activation enhances EEG abnormality in mild cognitive impairment. *Neurobiol Aging* **28**, 85-90.
- [96] van der Hiele K, Vein AA, Reijntjes RH, Westendorp RG, Bollen EL, van Buchem MA, van Dijk JG, Middelkoop HA (2007) EEG correlates in the spectrum of cognitive decline. *Clin Neurophysiol* **118**, 1931-1939.
- [97] van der Hiele K, Reijntjes RH, Vein AA, Westendorp RG, van Buchem MA, Bollen EL, Middelkoop HA, van Dijk JG (2011) Electromyographic activity in the EEG in Alzheimer's disease: noise or signal? *Int J Alzheimers Dis* **2011**, 547024.
- [98] Vecchio F, Miraglia F, Marra C, Quaranta D, Vita MG, Bramanti P, Rossini PM (2014) Human brain networks in cognitive decline: a graph theoretical analysis of cortical connectivity from EEG data. *J Alzheimers Dis* **41**, 113-127.
- [99] Wen D, Xue Q, Lu C, Guan X, Wang Y, Li X (2014) A global coupling index of multivariate neural series with application to the evaluation of mild cognitive impairment. *Neural Netw* **56**, 1-9.
- [100] Xu P, Xiong XC, Xue Q, Tian Y, Peng Y, Zhang R, Li PY, Wang YP (2014) Recognizing mild cognitive impairment based on network connectivity analysis of resting EEG with zero reference. *Physiol Meas* **35**, 1279-1298.
- [101] Ya M, Xun W, Wei L, Ting H, Hong Y, Yuan Z (2015) Is the electroencephalogram power spectrum valuable for diagnosis of the elderly with cognitive impairment? *Int J Gerontol* **9**, 196-200.
- [102] Yener GG, Kurt P, Emek-Savaş DD, Güntekin B, Başar E (2013) Reduced visual event-related delta oscillatory responses in amnesic mild cognitive impairment. *J Alzheimers Dis* **37**, 759-767.

- [103] Yener GG, Fide E, Özbek Y, Emek-Savaş DD, Aktürk T, Çakmur R, Güntekin B (2019)  
The difference of mild cognitive impairment in Parkinson's disease from amnesic mild  
cognitive impairment: Deeper power decrement and no phase-locking in visual event-  
related responses. *Int J Psychophysiol* **139**, 48-58.

**Supplementary Material 3: Funnel Plots**

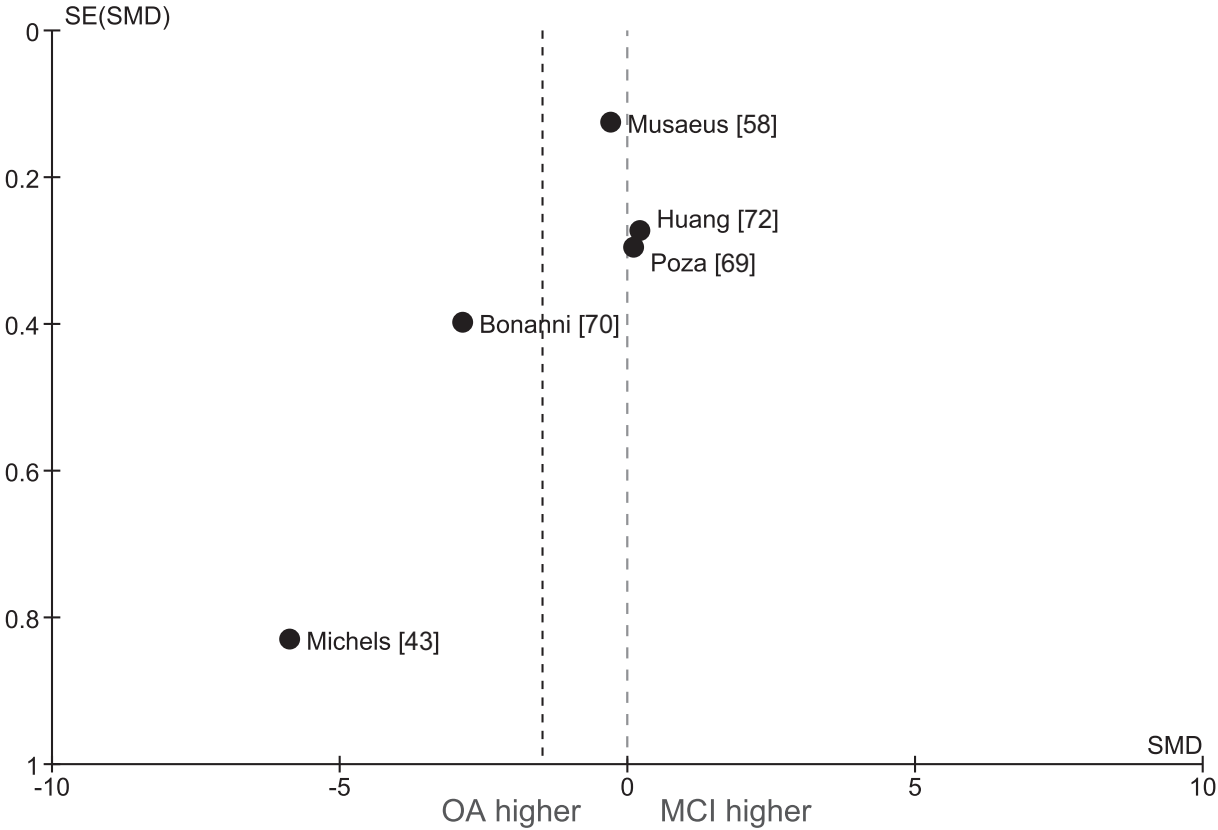

**Supplementary Figure 1.** Funnel plot for the meta-analysis comparing resting state alpha power in cognitively healthy older adults and people with MCI. Black dashed line marks the pooled standardized mean difference (SMD = -1.49, random-effects model).

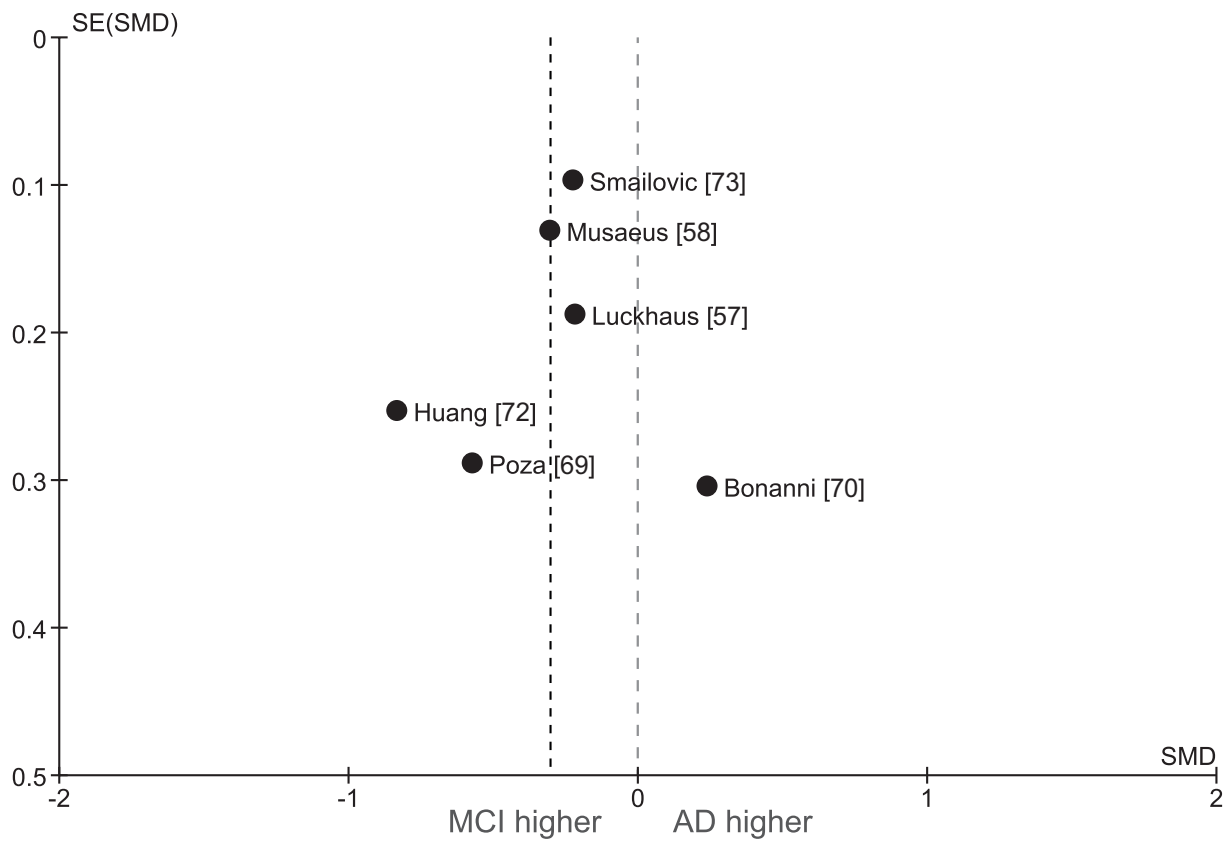

**Supplementary Figure 2.** Funnel plot for the meta-analysis comparing resting state alpha power in people with MCI and people with AD. Black dashed line marks the pooled standardized mean difference (SMD = -0.30, random-effects model).

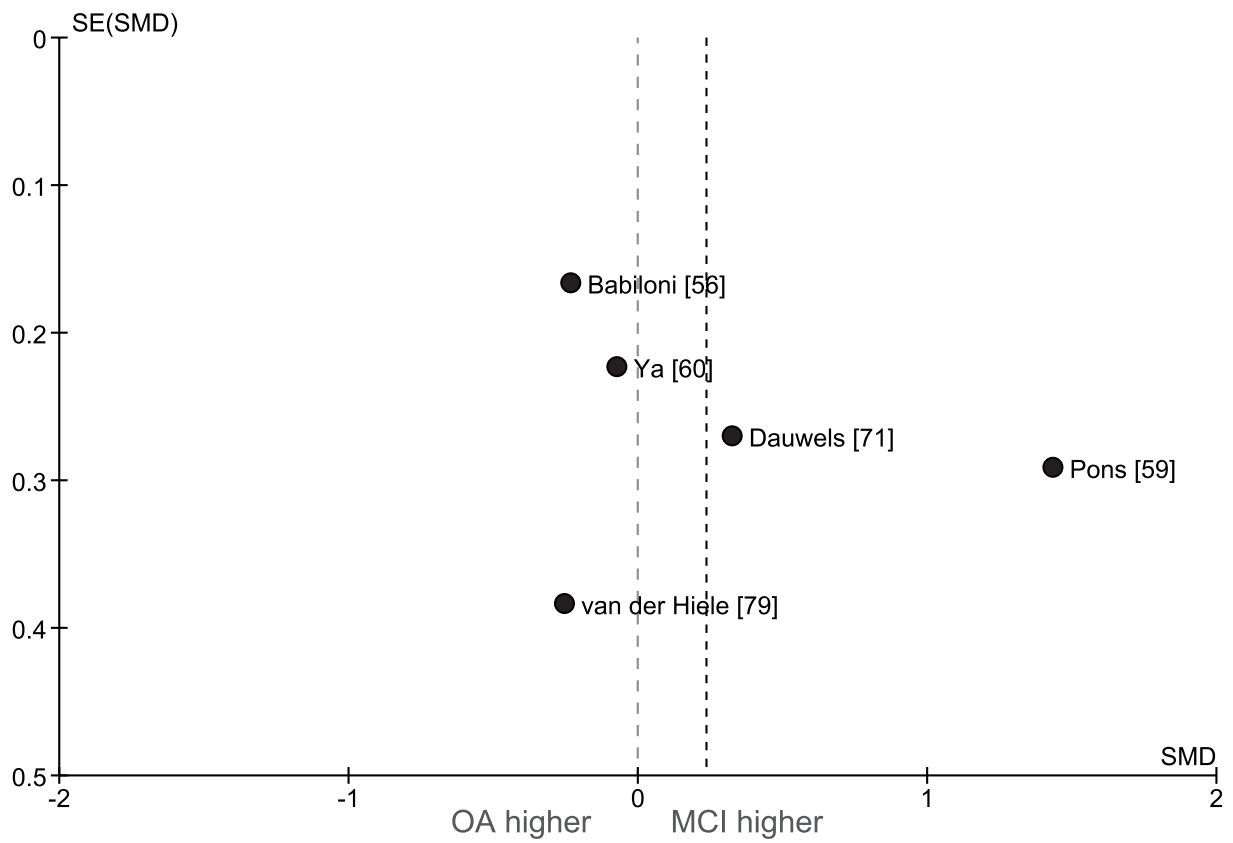

**Supplementary Figure 3.** Funnel plot for the meta-analysis comparing lower resting state alpha power in cognitively healthy older adults and people with MCI. Black dashed line marks the pooled standardized mean difference (SMD = 0.23, random-effects model).



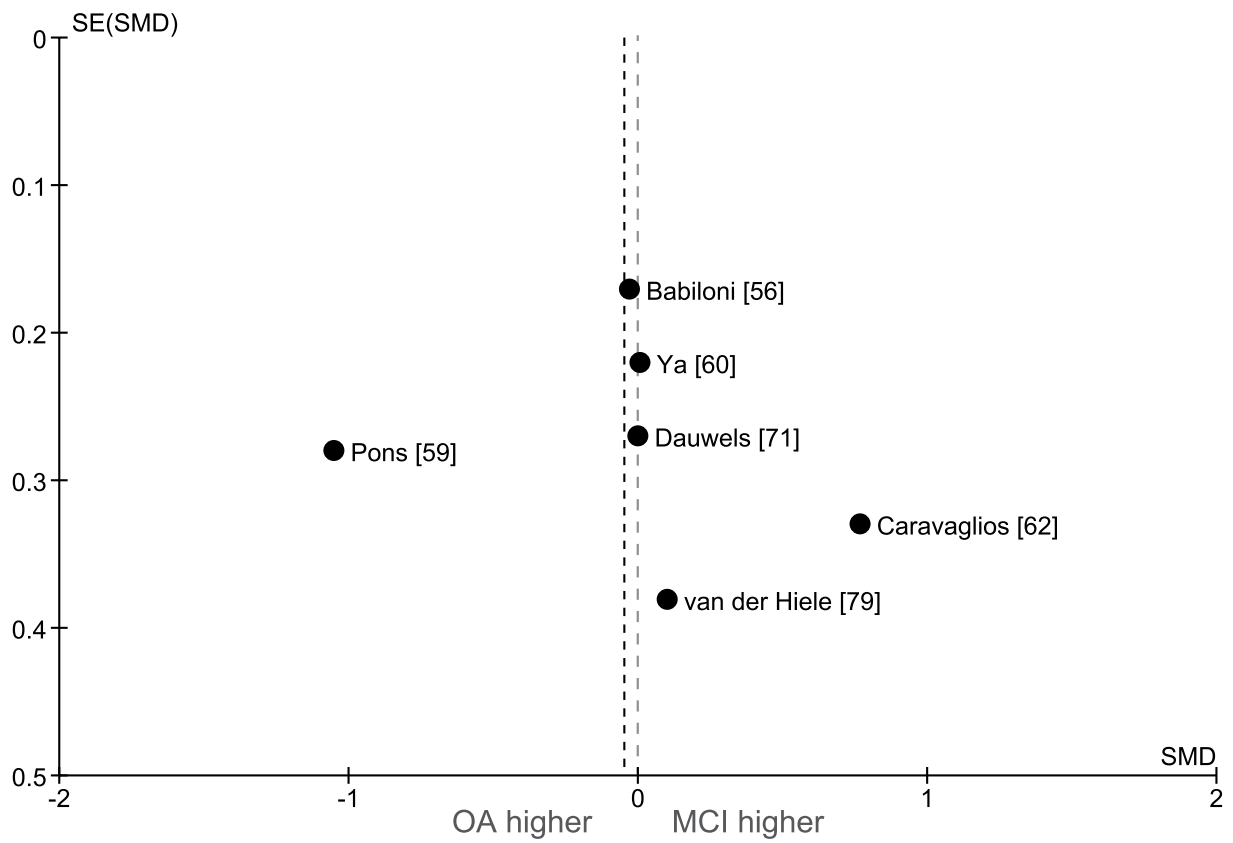

**Supplementary Figure 4.** Funnel plot for the meta-analysis comparing upper resting state alpha power in cognitively healthy older adults and people with MCI. Black dashed line marks the pooled standardized mean difference (SMD = -0.05, random-effects model).

## Supplementary Material 4: Fixed-Effects Meta-Analyses

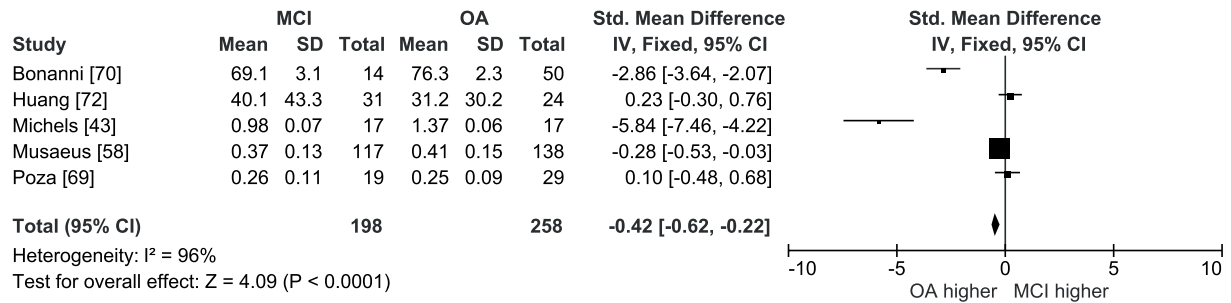

**Supplementary Figure 5.** Table and forest plot of effect sizes for power in awake resting state in the full alpha band in people with MCI versus cognitively healthy older adults (OA).

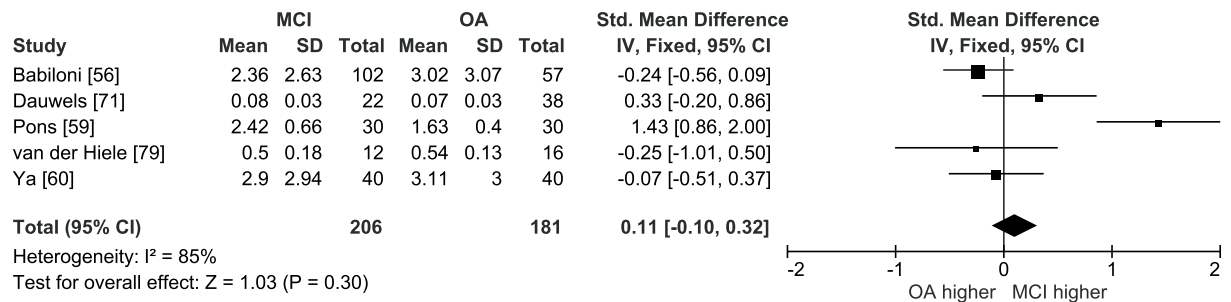

**Supplementary Figure 6.** Table and forest plot of effect sizes for power in awake resting state in the lower alpha band in people with MCI versus cognitively healthy older adults (OA).

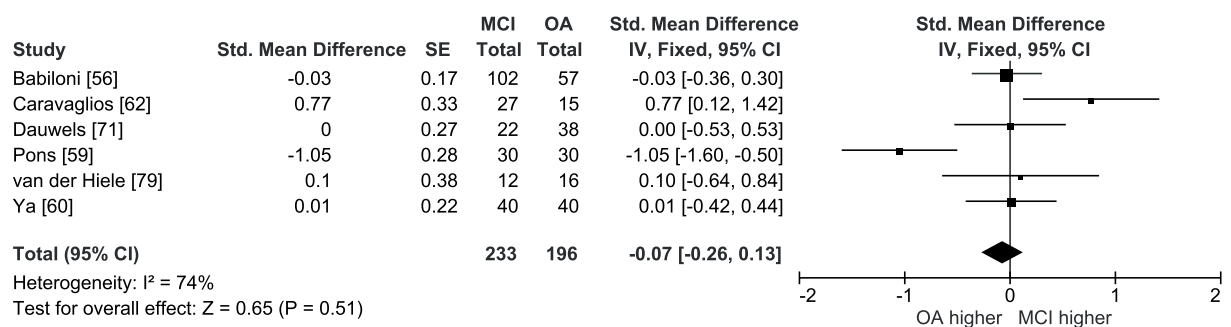

**Supplementary Figure 7.** Table and forest plot of effect sizes for power in awake resting state in the upper alpha band in people with MCI versus cognitively healthy older adults (OA).
